# Supplementary material for: Synthesis of Phenol-Tagged Ruthenium Alkylidene Olefin Metathesis Catalysts for Robust Immobilisation Inside Metal–Organic Framework Support
Source: MDPI journal article supplement (doi:10.3390/catal13020297), 2023-01-28
Supplement: s1 [file s1]

Archive with 1 entries (1 files):
- catalysts-2166661-supplementary.pdf
